# Supplementary material
Source: PubMed Central journal article supplement (PMC6209123)
Supplement: NIHMS1504020-supplement-COA_form.pdf [file NIHMS1504020-supplement-COA_form.pdf]

## Change of Authorship Form

---

(Must be completed and signed by ALL authors)

Please check all that apply

New author(s) have been added (in addition to this form, all new authors must complete the copyright transfer agreement and conflict of interest disclosure.

Change in order of authorship.

An author wishes to remove his/her name. An author's name may only be removed his/her own request and a letter signed by the author should accompany this form

Manuscript Number STROKE/2018/022114D-AR1

Manuscript Title Endovascular Thrombectomy for Mild Strokes: How Low Should We Go? A Multicenter Cohort Study

### Former Authorship

Please list ALL AUTHORS in the same order as the original submission. For more than 12, use an extra sheet.

#### Print Name

Name (1) Amrou Sarraj  
Name (2) Ameer Hassan  
Name (3) Sean I Savitz  
Name (4) James C Grotta  
Name (5) Kaushik N Parsha  
Name (6) Christine M Farrell

#### Print Name

Name (7) Bitra Imam  
Name (8) Clark W Sitton  
Name (9) Haris Kamal  
Name (10) Nitin Goyal  
Name (11) Lucas Elijovich  
Name (12) Katelin Reishus

### New Authorship

All authors must sign below agreeing to the changes in authorship. The authorship order must reflect the authorship order of the manuscript.

|                                     |                                                                                                       |                      |
|-------------------------------------|-------------------------------------------------------------------------------------------------------|----------------------|
| Name (1) <u>Amrou Sarraj</u>        | Signature <u></u> | Date <u>8.8.2018</u> |
| Name (2) <u>Ameer Hassan</u>        | Signature _____                                                                                       | Date _____           |
| Name (3) <u>Sean I Savitz</u>       | Signature _____                                                                                       | Date _____           |
| Name (4) <u>James C Grotta</u>      | Signature _____                                                                                       | Date _____           |
| Name (5) <u>Chunyan Cai</u>         | Signature _____                                                                                       | Date _____           |
| Name (6) <u>Kaushik N Parsha</u>    | Signature _____                                                                                       | Date _____           |
| Name (7) <u>Christine M Farrell</u> | Signature _____                                                                                       | Date _____           |
| Name (8) <u>Bitra Imam</u>          | Signature <u></u> | Date <u>8.8.2018</u> |
| Name (9) <u>Clark W Sitton</u>      | Signature _____                                                                                       | Date _____           |
| Name (10) <u>Sujan T Reddy</u>      | Signature <u></u>  | Date <u>8.8.2018</u> |
| Name (11) <u>Haris Kamal</u>        | Signature _____                                                                                       | Date _____           |
| Name (12) <u>Nitin Goyal</u>        | Signature _____                                                                                       | Date _____           |

Please scan and email to [stroke@strokeahajournal.org](mailto:stroke@strokeahajournal.org).

**Manuscript Nubmer:** STROKE/2018/022114D-AR1

**Manuscript Title:** Endovascular Thrombectomy for Mild Strokes: How Low Should We Go? A Multicenter Cohort Study

**Former Authorship Continued:**

**Print Name**

- Name (13) Rashi Krishnan
- Name (14) Navdeep Sangha
- Name (15) Abel Wu
- Name (16) Renata Costa
- Name (17) Ruqayyah Malik
- Name (18) Chunyan Cai
- Name (19) Osman Mir
- Name (20) Rashedul Hasan

**Print Name**

- Name (21) Lindsay M Snodgrass
- Name (22) Manuel Requena
- Name (23) Dion Graybeal
- Name (24) Michael Abraham
- Name (25) Michael Chen
- Name (26) Louise D McCullough
- Name (27) Marc Ribo

**New Authorship**

All authors must sign below agreeing to the changes in authorship. The authorship order must reflect the authorship order of the manuscript.

**New Authorship Continued:**

**Print Name**

|                               |                                                                                                     |                     |
|-------------------------------|-----------------------------------------------------------------------------------------------------|---------------------|
| Name (13) Lucas Elijevich     | Signature _____                                                                                     | Date _____          |
| Name (14) Katelin Reishus     | Signature _____                                                                                     | Date _____          |
| Name (15) Rashi Krishnan      | Signature _____                                                                                     | Date _____          |
| Name (16) Navdeep Sangha      | Signature _____                                                                                     | Date _____          |
| Name (17) Abel Wu             | Signature _____                                                                                     | Date _____          |
| Name (18) Renata Costa        | Signature _____                                                                                     | Date _____          |
| Name (19) Ruqayyah Malik      | Signature _____                                                                                     | Date _____          |
| Name (20) Osman Mir           | Signature _____                                                                                     | Date _____          |
| Name (21) Rashedul Hasan      | Signature _____                                                                                     | Date _____          |
| Name (22) Lindsay M Snodgrass | Signature _____                                                                                     | Date _____          |
| Name (23) Manuel Requena      | Signature _____                                                                                     | Date _____          |
| Name (24) Dion Graybeal       | Signature _____                                                                                     | Date _____          |
| Name (25) Michael Abraham     | Signature _____                                                                                     | Date _____          |
| Name (26) Michael Chen        | Signature  _____ | Date <u>8-10-18</u> |
| Name (27) Louise D McCullough | Signature _____                                                                                     | Date _____          |
| Name (28) Marc Ribo           | Signature _____                                                                                     | Date _____          |

**Manuscript Nubmer:** STROKE/2018/022114D-AR1

**Manuscript Title:** Endovascular Thrombectomy for Mild Strokes: How Low Should We Go? A Multicenter Cohort Study

**Former Authorship Continued:**

**Print Name**

- Name (13) Rashi Krishnan
- Name (14) Navdeep Sangha
- Name (15) Abel Wu
- Name (16) Renata Costa
- Name (17) Ruqayyah Malik
- Name (18) Chunyan Cai
- Name (19) Osman Mir
- Name (20) Rashedul Hasan

**Print Name**

- Name (21) Lindsay M Snodgrass
- Name (22) Manuel Requena
- Name (23) Dion Graybeal
- Name (24) Michael Abraham
- Name (25) Michael Chen
- Name (26) Louise D McCullough
- Name (27) Marc Ribo

**New Authorship**

All authors must sign below agreeing to the changes in authorship. The authorship order must reflect the authorship order of the manuscript.

**New Authorship Continued:**

**Print Name**

|                               |                                                                                               |              |
|-------------------------------|-----------------------------------------------------------------------------------------------|--------------|
| Name (13) Lucas Elijevich     | Signature _____                                                                               | Date _____   |
| Name (14) Katelin Reishus     | Signature _____                                                                               | Date _____   |
| Name (15) Rashi Krishnan      | Signature _____                                                                               | Date _____   |
| Name (16) Navdeep Sangha      | Signature _____                                                                               | Date _____   |
| Name (17) Abel Wu             | Signature _____                                                                               | Date _____   |
| Name (18) Renata Costa        | Signature _____                                                                               | Date _____   |
| Name (19) Ruqayyah Malik      | Signature _____                                                                               | Date _____   |
| Name (20) Osman Mir           | Signature _____                                                                               | Date _____   |
| Name (21) Rashedul Hasan      | Signature _____                                                                               | Date _____   |
| Name (22) Lindsay M Snodgrass | Signature _____                                                                               | Date _____   |
| Name (23) Manuel Requena      | Signature _____                                                                               | Date _____   |
| Name (24) Dion Graybeal       | Signature _____                                                                               | Date _____   |
| Name (25) Michael Abraham     | Signature _____                                                                               | Date _____   |
| Name (26) Michael Chen        | Signature _____                                                                               | Date _____   |
| Name (27) Louise D McCullough | Signature  | Date 8/13/18 |
| Name (28) Marc Ribo           | Signature _____                                                                               | Date _____   |

## Change of Authorship Form

(Must be completed and signed by ALL authors)

Please check all that apply

New author(s) have been added (in addition to this form, all new authors must complete the copyright transfer agreement and conflict of interest disclosure.

Change in order of authorship.

An author wishes to remove his/her name. An author's name may only be removed his/her own request and a letter signed by the author should accompany this form

Manuscript Number STROKE/2018/022114D-AR1 \_\_\_\_\_

Manuscript Title Endovascular Thrombectomy for Mild Strokes: How Low Should We Go? A Multicenter Cohort Study

### Former Authorship

Please list ALL AUTHORS in the same order as the original submission. For more than 12, use an extra sheet.

#### Print Name

Name (1) Amrou Sarraj  
Name (2) Ameer Hassan  
Name (3) Sean I Savitz  
Name (4) James C Grotta  
Name (5) Kaushik N Parsha  
Name (6) Christine M Farrell

#### Print Name

Name (7) Bitra Imam  
Name (8) Clark W Sitton  
Name (9) Haris Kamal  
Name (10) Nitin Goyal  
Name (11) Lucas Elijevich  
Name (12) Katelin Reishus

### New Authorship

All authors must sign below agreeing to the changes in authorship. The authorship order must reflect the authorship order of the manuscript.

|                                     |                                                                                                       |                      |
|-------------------------------------|-------------------------------------------------------------------------------------------------------|----------------------|
| Name (1) <u>Amrou Sarraj</u>        | Signature <u></u> | Date <u>8.8.2018</u> |
| Name (2) <u>Ameer Hassan</u>        | Signature _____                                                                                       | Date _____           |
| Name (3) <u>Sean I Savitz</u>       | Signature _____                                                                                       | Date _____           |
| Name (4) <u>James C Grotta</u>      | Signature _____                                                                                       | Date _____           |
| Name (5) <u>Chunyan Cai</u>         | Signature _____                                                                                       | Date _____           |
| Name (6) <u>Kaushik N Parsha</u>    | Signature _____                                                                                       | Date _____           |
| Name (7) <u>Christine M Farrell</u> | Signature _____                                                                                       | Date _____           |
| Name (8) <u>Bitra Imam</u>          | Signature <u></u> | Date <u>8.8.2018</u> |
| Name (9) <u>Clark W Sitton</u>      | Signature _____                                                                                       | Date _____           |
| Name (10) <u>Sujan T Reddy</u>      | Signature <u></u>  | Date <u>8.8.2018</u> |
| Name (11) <u>Haris Kamal</u>        | Signature _____                                                                                       | Date _____           |
| Name (12) <u>Nitin Goyal</u>        | Signature _____                                                                                       | Date _____           |

Please scan and email to [stroke@strokeahajournal.org](mailto:stroke@strokeahajournal.org).

**Manuscript Nubmer:** STROKE/2018/022114D-AR1

**Manuscript Title:** Endovascular Thrombectomy for Mild Strokes: How Low Should We Go? A Multicenter Cohort Study

**Former Authorship Continued:**

**Print Name**

- Name (13) Rashi Krishnan
- Name (14) Navdeep Sangha
- Name (15) Abel Wu
- Name (16) Renata Costa
- Name (17) Ruqayyah Malik
- Name (18) Chunyan Cai
- Name (19) Osman Mir
- Name (20) Rashedul Hasan

**Print Name**

- Name (21) Lindsay M Snodgrass
- Name (22) Manuel Requena
- Name (23) Dion Graybeal
- Name (24) Michael Abraham
- Name (25) Michael Chen
- Name (26) Louise D McCullough
- Name (27) Marc Ribo

**New Authorship**

All authors must sign below agreeing to the changes in authorship. The authorship order must reflect the authorship order of the manuscript.

**New Authorship Continued:**

**Print Name**

|                               |                                                                                                     |             |
|-------------------------------|-----------------------------------------------------------------------------------------------------|-------------|
| Name (13) Lucas Elijevich     | Signature _____                                                                                     | Date _____  |
| Name (14) Katelin Reishus     | Signature _____                                                                                     | Date _____  |
| Name (15) Rashi Krishnan      | Signature _____                                                                                     | Date _____  |
| Name (16) Navdeep Sangha      | Signature _____                                                                                     | Date _____  |
| Name (17) Abel Wu             | Signature  _____ | Date 8/8/19 |
| Name (18) Renata Costa        | Signature _____                                                                                     | Date _____  |
| Name (19) Ruqayyah Malik      | Signature _____                                                                                     | Date _____  |
| Name (20) Osman Mir           | Signature _____                                                                                     | Date _____  |
| Name (21) Rashedul Hasan      | Signature _____                                                                                     | Date _____  |
| Name (22) Lindsay M Snodgrass | Signature _____                                                                                     | Date _____  |
| Name (23) Manuel Requena      | Signature _____                                                                                     | Date _____  |
| Name (24) Dion Graybeal       | Signature _____                                                                                     | Date _____  |
| Name (25) Michael Abraham     | Signature _____                                                                                     | Date _____  |
| Name (26) Michael Chen        | Signature _____                                                                                     | Date _____  |
| Name (27) Louise D McCullough | Signature _____                                                                                     | Date _____  |
| Name (28) Marc Ribo           | Signature _____                                                                                     | Date _____  |

## Change of Authorship Form

(Must be completed and signed by ALL authors)

Please check all that apply

New author(s) have been added (in addition to this form, all new authors must complete the copyright transfer agreement and conflict of interest disclosure.

Change in order of authorship.

\_\_\_\_\_ An author wishes to remove his/her name. An author's name may only be removed his/her own request and a letter signed by the author should accompany this form

Manuscript Number STROKE/2018/022114D-AR1

Manuscript Title Endovascular Thrombectomy for Mild Strokes: How Low Should We Go? A Multicenter Cohort Study

### Former Authorship

Please list ALL AUTHORS in the same order as the original submission. For more than 12, use an extra sheet.

#### Print Name

Name (1) Amrou Sarraj  
Name (2) Ameer Hassan  
Name (3) Sean I Savitz  
Name (4) James C Grotta  
Name (5) Kaushik N Parsha  
Name (6) Christine M Farrell

#### Print Name

Name (7) Bitra Imam  
Name (8) Clark W Sitton  
Name (9) Haris Kamal  
Name (10) Nitin Goyal  
Name (11) Lucas Elijevich  
Name (12) Katelin Reishus

### New Authorship

All authors must sign below agreeing to the changes in authorship. The authorship order must reflect the authorship order of the manuscript.

|                                     |                                                                                                       |                      |
|-------------------------------------|-------------------------------------------------------------------------------------------------------|----------------------|
| Name (1) <u>Amrou Sarraj</u>        | Signature <u>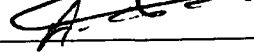</u> | Date <u>8.8.2018</u> |
| Name (2) <u>Ameer Hassan</u>        | Signature _____                                                                                       | Date _____           |
| Name (3) <u>Sean I Savitz</u>       | Signature _____                                                                                       | Date _____           |
| Name (4) <u>James C Grotta</u>      | Signature _____                                                                                       | Date _____           |
| Name (5) <u>Chunyan Cai</u>         | Signature _____                                                                                       | Date _____           |
| Name (6) <u>Kaushik N Parsha</u>    | Signature _____                                                                                       | Date _____           |
| Name (7) <u>Christine M Farrell</u> | Signature _____                                                                                       | Date _____           |
| Name (8) <u>Bitra Imam</u>          | Signature <u></u> | Date <u>8.8.2018</u> |
| Name (9) <u>Clark W Sitton</u>      | Signature _____                                                                                       | Date _____           |
| Name (10) <u>Sujan T Reddy</u>      | Signature <u></u>  | Date <u>8.8.2018</u> |
| Name (11) <u>Haris Kamal</u>        | Signature _____                                                                                       | Date _____           |
| Name (12) <u>Nitin Goyal</u>        | Signature _____                                                                                       | Date _____           |

Please scan and email to [stroke@strokeahajournal.org](mailto:stroke@strokeahajournal.org).



## Change of Authorship Form

(Must be completed and signed by ALL authors)

Please check all that apply

New author(s) have been added (in addition to this form, all new authors must complete the copyright transfer agreement and conflict of interest disclosure.

Change in order of authorship.

An author wishes to remove his/her name. An author's name may only be removed his/her own request and a letter signed by the author should accompany this form

Manuscript Number STROKE/2018/022114D-AR1 \_\_\_\_\_

Manuscript Title Endovascular Thrombectomy for Mild Strokes: How Low Should We Go? A Multicenter Cohort Study

### Former Authorship

Please list ALL AUTHORS in the same order as the original submission. For more than 12, use an extra sheet.

#### Print Name

Name (1) Amrou Sarraj  
Name (2) Ameer Hassan  
Name (3) Sean I Savitz  
Name (4) James C Grotta  
Name (5) Kaushik N Parsha  
Name (6) Christine M Farrell

#### Print Name

Name (7) Bitra Imam  
Name (8) Clark W Sitton  
Name (9) Haris Kamal  
Name (10) Nitin Goyal  
Name (11) Lucas Elijevich  
Name (12) Katelin Reishus

### New Authorship

All authors must sign below agreeing to the changes in authorship. The authorship order must reflect the authorship order of the manuscript.

|                                     |                                                                                                       |                      |
|-------------------------------------|-------------------------------------------------------------------------------------------------------|----------------------|
| Name (1) <u>Amrou Sarraj</u>        | Signature <u></u> | Date <u>8.8.2018</u> |
| Name (2) <u>Ameer Hassan</u>        | Signature _____                                                                                       | Date _____           |
| Name (3) <u>Sean I Savitz</u>       | Signature _____                                                                                       | Date _____           |
| Name (4) <u>James C Grotta</u>      | Signature _____                                                                                       | Date _____           |
| Name (5) <u>Chunyan Cai</u>         | Signature _____                                                                                       | Date _____           |
| Name (6) <u>Kaushik N Parsha</u>    | Signature _____                                                                                       | Date _____           |
| Name (7) <u>Christine M Farrell</u> | Signature _____                                                                                       | Date _____           |
| Name (8) <u>Bitra Imam</u>          | Signature <u></u> | Date <u>8.8.2018</u> |
| Name (9) <u>Clark W Sitton</u>      | Signature _____                                                                                       | Date _____           |
| Name (10) <u>Sujan T Reddy</u>      | Signature <u></u>  | Date <u>8.8.2018</u> |
| Name (11) <u>Haris Kamal</u>        | Signature _____                                                                                       | Date _____           |
| Name (12) <u>Nitin Goyal</u>        | Signature _____                                                                                       | Date _____           |

Please scan and email to [stroke@strokeahajournal.org](mailto:stroke@strokeahajournal.org).



**Manuscript Nubmer:** STROKE/2018/022114D-AR1

**Manuscript Title:** Endovascular Thrombectomy for Mild Strokes: How Low Should We Go? A Multicenter Cohort Study

**Former Authorship Continued:**

**Print Name**

Name (13) Rashi Krishnan  
Name (14) Navdeep Sangha  
Name (15) Abel Wu  
Name (16) Renata Costa  
Name (17) Ruqayyah Malik  
Name (18) Chunyan Cai  
Name (19) Osman Mir  
Name (20) Rashedul Hasan

**Print Name**

Name (21) Lindsay M Snodgrass  
Name (22) Manuel Requena  
Name (23) Dion Graybeal  
Name (24) Michael Abraham  
Name (25) Michael Chen  
Name (26) Louise D McCullough  
Name (27) Marc Ribo

**New Authorship**

All authors must sign below agreeing to the changes in authorship. The authorship order must reflect the authorship order of the manuscript.

**New Authorship Continued:**

**Print Name**

|                               |                                                                                                     |               |
|-------------------------------|-----------------------------------------------------------------------------------------------------|---------------|
| Name (13) Lucas Elijevich     | Signature _____                                                                                     | Date _____    |
| Name (14) Katelin Reishus     | Signature _____                                                                                     | Date _____    |
| Name (15) Rashi Krishnan      | Signature _____                                                                                     | Date _____    |
| Name (16) Navdeep Sangha      | Signature _____                                                                                     | Date _____    |
| Name (17) Abel Wu             | Signature _____                                                                                     | Date _____    |
| Name (18) Renata Costa        | Signature _____                                                                                     | Date _____    |
| Name (19) Ruqayyah Malik      | Signature _____                                                                                     | Date _____    |
| Name (20) Osman Mir           | Signature _____                                                                                     | Date _____    |
| Name (21) Rashedul Hasan      | Signature _____                                                                                     | Date _____    |
| Name (22) Lindsay M Snodgrass | Signature _____                                                                                     | Date _____    |
| Name (23) Manuel Requena      | Signature _____                                                                                     | Date _____    |
| Name (24) Dion Graybeal       | Signature _____                                                                                     | Date _____    |
| Name (25) Michael Abraham     | Signature  _____ | Date 8-9-2018 |
| Name (26) Michael Chen        | Signature _____                                                                                     | Date _____    |
| Name (27) Louise D McCullough | Signature _____                                                                                     | Date _____    |
| Name (28) Marc Ribo           | Signature _____                                                                                     | Date _____    |

## Change of Authorship Form

(Must be completed and signed by ALL authors)

Please check all that apply

New author(s) have been added (in addition to this form, all new authors must complete the copyright transfer agreement and conflict of interest disclosure.

Change in order of authorship.

An author wishes to remove his/her name. An author's name may only be removed his/her own request and a letter signed by the author should accompany this form

Manuscript Number STROKE/2018/022114D-AR1 \_\_\_\_\_

Manuscript Title Endovascular Thrombectomy for Mild Strokes: How Low Should We Go? A Multicenter Cohort Study

### Former Authorship

Please list ALL AUTHORS in the same order as the original submission. For more than 12, use an extra sheet.

#### Print Name

Name (1) Amrou Sarraj  
Name (2) Ameer Hassan  
Name (3) Sean I Savitz  
Name (4) James C Grotta  
Name (5) Kaushik N Parsha  
Name (6) Christine M Farrell

#### Print Name

Name (7) Bitra Imam  
Name (8) Clark W Sitton  
Name (9) Haris Kamal  
Name (10) Nitin Goyal  
Name (11) Lucas Elijevich  
Name (12) Katelin Reishus

### New Authorship

All authors must sign below agreeing to the changes in authorship. The authorship order must reflect the authorship order of the manuscript.

|                                     |                                                                                                       |                      |
|-------------------------------------|-------------------------------------------------------------------------------------------------------|----------------------|
| Name (1) <u>Amrou Sarraj</u>        | Signature <u></u> | Date <u>8.8.2018</u> |
| Name (2) <u>Ameer Hassan</u>        | Signature _____                                                                                       | Date _____           |
| Name (3) <u>Sean I Savitz</u>       | Signature _____                                                                                       | Date _____           |
| Name (4) <u>James C Grotta</u>      | Signature _____                                                                                       | Date _____           |
| Name (5) <u>Chunyan Cai</u>         | Signature _____                                                                                       | Date _____           |
| Name (6) <u>Kaushik N Parsha</u>    | Signature _____                                                                                       | Date _____           |
| Name (7) <u>Christine M Farrell</u> | Signature _____                                                                                       | Date _____           |
| Name (8) <u>Bitra Imam</u>          | Signature <u></u> | Date <u>8.8.2018</u> |
| Name (9) <u>Clark W Sitton</u>      | Signature _____                                                                                       | Date _____           |
| Name (10) <u>Sujan T Reddy</u>      | Signature <u></u>  | Date <u>8.8.2018</u> |
| Name (11) <u>Haris Kamal</u>        | Signature _____                                                                                       | Date _____           |
| Name (12) <u>Nitin Goyal</u>        | Signature _____                                                                                       | Date _____           |

Please scan and email to [stroke@strokeahajournal.org](mailto:stroke@strokeahajournal.org).



# Change of Authorship Form

(Must be completed and signed by ALL authors)

Please check all that apply

New author(s) have been added (in addition to this form, all new authors must complete the copyright transfer agreement and conflict of interest disclosure.

Change in order of authorship.

An author wishes to remove his/her name. An author's name may only be removed his/her own request and a letter signed by the author should accompany this form

Manuscript Number STROKE/2018/022114D-AR1 \_\_\_\_\_

Manuscript Title Endovascular Thrombectomy for Mild Strokes: How Low Should We Go? A Multicenter Cohort Study

## Former Authorship

Please list ALL AUTHORS in the same order as the original submission. For more than 12, use an extra sheet.

### Print Name

Name (1) Amrou Sarraj  
Name (2) Ameer Hassan  
Name (3) Sean I Savitz  
Name (4) James C Grotta  
Name (5) Kaushik N Parsha  
Name (6) Christine M Farrell

### Print Name

Name (7) Bitra Imam  
Name (8) Clark W Sitton  
Name (9) Haris Kamal  
Name (10) Nitin Goyal  
Name (11) Lucas Elijevich  
Name (12) Katelin Reishus

## New Authorship

All authors must sign below agreeing to the changes in authorship. The authorship order must reflect the authorship order of the manuscript.

|                                     |                                                                                                       |                      |
|-------------------------------------|-------------------------------------------------------------------------------------------------------|----------------------|
| Name (1) <u>Amrou Sarraj</u>        | Signature <u></u> | Date <u>8.8.2018</u> |
| Name (2) <u>Ameer Hassan</u>        | Signature _____                                                                                       | Date _____           |
| Name (3) <u>Sean I Savitz</u>       | Signature _____                                                                                       | Date _____           |
| Name (4) <u>James C Grotta</u>      | Signature _____                                                                                       | Date _____           |
| Name (5) <u>Chunyan Cai</u>         | Signature _____                                                                                       | Date _____           |
| Name (6) <u>Kaushik N Parsha</u>    | Signature _____                                                                                       | Date _____           |
| Name (7) <u>Christine M Farrell</u> | Signature <u></u>  | Date <u>8.8.2018</u> |
| Name (8) <u>Bitra Imam</u>          | Signature <u></u> | Date <u>8.8.2018</u> |
| Name (9) <u>Clark W Sitton</u>      | Signature _____                                                                                       | Date _____           |
| Name (10) <u>Sujan T Reddy</u>      | Signature <u></u>  | Date <u>8.8.2018</u> |
| Name (11) <u>Haris Kamal</u>        | Signature _____                                                                                       | Date _____           |
| Name (12) <u>Nitin Goyal</u>        | Signature _____                                                                                       | Date _____           |

Please scan and email to [stroke@strokeahajournal.org](mailto:stroke@strokeahajournal.org).

**Manuscript Nubmer:** STROKE/2018/022114D-AR1

**Manuscript Title:** Endovascular Thrombectomy for Mild Strokes: How Low Should We Go? A Multicenter Cohort Study

**Former Authorship Continued:**

**Print Name**

Name (13) Rashi Krishnan  
Name (14) Navdeep Sangha  
Name (15) Abel Wu  
Name (16) Renata Costa  
Name (17) Ruqayyah Malik  
Name (18) Chunyan Cai  
Name (19) Osman Mir  
Name (20) Rashedul Hasan

**Print Name**

Name (21) Lindsay M Snodgrass  
Name (22) Manuel Requena  
Name (23) Dion Graybeal  
Name (24) Michael Abraham  
Name (25) Michael Chen  
Name (26) Louise D McCullough  
Name (27) Marc Ribo

**New Authorship**

All authors must sign below agreeing to the changes in authorship. The authorship order must reflect the authorship order of the manuscript.

**New Authorship Continued:**

**Print Name**

|                               |                 |            |
|-------------------------------|-----------------|------------|
| Name (13) Lucas Elijevich     | Signature _____ | Date _____ |
| Name (14) Katelin Reishus     | Signature _____ | Date _____ |
| Name (15) Rashi Krishnan      | Signature _____ | Date _____ |
| Name (16) Navdeep Sangha      | Signature _____ | Date _____ |
| Name (17) Abel Wu             | Signature _____ | Date _____ |
| Name (18) Renata Costa        | Signature _____ | Date _____ |
| Name (19) Ruqayyah Malik      | Signature _____ | Date _____ |
| Name (20) Osman Mir           | Signature _____ | Date _____ |
| Name (21) Rashedul Hasan      | Signature _____ | Date _____ |
| Name (22) Lindsay M Snodgrass | Signature _____ | Date _____ |
| Name (23) Manuel Requena      | Signature _____ | Date _____ |
| Name (24) Dion Graybeal       | Signature _____ | Date _____ |
| Name (25) Michael Abraham     | Signature _____ | Date _____ |
| Name (26) Michael Chen        | Signature _____ | Date _____ |
| Name (27) Louise D McCullough | Signature _____ | Date _____ |
| Name (28) Marc Ribo           | Signature _____ | Date _____ |

## Change of Authorship Form

(Must be completed and signed by ALL authors)

Please check all that apply

New author(s) have been added (in addition to this form, all new authors must complete the copyright transfer agreement and conflict of interest disclosure.

Change in order of authorship.

An author wishes to remove his/her name. An author's name may only be removed his/her own request and a letter signed by the author should accompany this form

Manuscript Number STROKE/2018/022114D-AR1

Manuscript Title Endovascular Thrombectomy for Mild Strokes: How Low Should We Go? A Multicenter Cohort Study

### Former Authorship

Please list ALL AUTHORS in the same order as the original submission. For more than 12, use an extra sheet.

#### Print Name

Name (1) Amrou Sarraj  
 Name (2) Ameer Hassan  
 Name (3) Sean I Savitz  
 Name (4) James C Grotta  
 Name (5) Kaushik N Parsha  
 Name (6) Christine M Farrell

#### Print Name

Name (7) Bitra Imam  
 Name (8) Clark W Sitton  
 Name (9) Haris Kamal  
 Name (10) Nitin Goyal  
 Name (11) Lucas Elijevich  
 Name (12) Katelin Reishus

### New Authorship

All authors must sign below agreeing to the changes in authorship. The authorship order must reflect the authorship order of the manuscript.

|                                     |                                                                                                       |                      |
|-------------------------------------|-------------------------------------------------------------------------------------------------------|----------------------|
| Name (1) <u>Amrou Sarraj</u>        | Signature <u></u> | Date <u>8.8.2018</u> |
| Name (2) <u>Ameer Hassan</u>        | Signature _____                                                                                       | Date _____           |
| Name (3) <u>Sean I Savitz</u>       | Signature _____                                                                                       | Date _____           |
| Name (4) <u>James C Grotta</u>      | Signature _____                                                                                       | Date _____           |
| Name (5) <u>Chunyan Cai</u>         | Signature _____                                                                                       | Date _____           |
| Name (6) <u>Kaushik N Parsha</u>    | Signature _____                                                                                       | Date _____           |
| Name (7) <u>Christine M Farrell</u> | Signature _____                                                                                       | Date _____           |
| Name (8) <u>Bitra Imam</u>          | Signature <u></u> | Date <u>8.8.2018</u> |
| Name (9) <u>Clark W Sitton</u>      | Signature _____                                                                                       | Date _____           |
| Name (10) <u>Sujan T Reddy</u>      | Signature <u></u>  | Date <u>8.8.2018</u> |
| Name (11) <u>Haris Kamal</u>        | Signature _____                                                                                       | Date _____           |
| Name (12) <u>Nitin Goyal</u>        | Signature <u></u> | Date <u>8.8.2018</u> |

Please scan and email to [stroke@strokeahajournal.org](mailto:stroke@strokeahajournal.org).

## Change of Authorship Form

(Must be completed and signed by ALL authors)

Please check all that apply

New author(s) have been added (in addition to this form, all new authors must complete the copyright transfer agreement and conflict of interest disclosure.

Change in order of authorship.

An author wishes to remove his/her name. An author's name may only be removed his/her own request and a letter signed by the author should accompany this form

Manuscript Number STROKE2018022114D-AR1

Manuscript Title Endovascular Thrombectomy for Mild Strokes: How Low Should We Go? A Multicenter Cohort Study

### Former Authorship

Please list ALL AUTHORS in the same order as the original submission. For more than 12, use an extra sheet.

#### Print Name

Name (1) Amrou Sarraj  
Name (2) Ameer Hassan  
Name (3) Sean I Savitz  
Name (4) James C Grotta  
Name (5) Kaushik N Parsha  
Name (6) Christine M Farrell

#### Print Name

Name (7) Bitia Imam  
Name (8) Clark W Sitton  
Name (9) Haris Kamal  
Name (10) Nitin Goyal  
Name (11) Lucas Elijevich  
Name (12) Katelin Reishus

### New Authorship

All authors must sign below agreeing to the changes in authorship. The authorship order must reflect the authorship order of the manuscript.

|                                     |                                                                                                       |                      |
|-------------------------------------|-------------------------------------------------------------------------------------------------------|----------------------|
| Name (1) <u>Amrou Sarraj</u>        | Signature <u></u> | Date <u>8.8.2018</u> |
| Name (2) <u>Ameer Hassan</u>        | Signature _____                                                                                       | Date _____           |
| Name (3) <u>Sean I Savitz</u>       | Signature _____                                                                                       | Date _____           |
| Name (4) <u>James C Grotta</u>      | Signature <u></u> | Date <u>8/8/18</u>   |
| Name (5) <u>Chunyan Cai</u>         | Signature _____                                                                                       | Date _____           |
| Name (6) <u>Kaushik N Parsha</u>    | Signature _____                                                                                       | Date _____           |
| Name (7) <u>Christine M Farrell</u> | Signature _____                                                                                       | Date _____           |
| Name (8) <u>Bitia Imam</u>          | Signature <u></u> | Date <u>8.8.2018</u> |
| Name (9) <u>Clark W Sitton</u>      | Signature _____                                                                                       | Date _____           |
| Name (10) <u>Sujan T Reddy</u>      | Signature <u></u>  | Date <u>8.8.2018</u> |
| Name (11) <u>Haris Kamal</u>        | Signature _____                                                                                       | Date _____           |
| Name (12) <u>Nitin Goyal</u>        | Signature _____                                                                                       | Date _____           |

Please scan and email to [stroke@strokeahajournal.org](mailto:stroke@strokeahajournal.org).

## Change of Authorship Form

(Must be completed and signed by ALL authors)

Please check all that apply

New author(s) have been added (in addition to this form, all new authors must complete the copyright transfer agreement and conflict of interest disclosure.

Change in order of authorship.

An author wishes to remove his/her name. An author's name may only be removed his/her own request and a letter signed by the author should accompany this form

Manuscript Number STROKE/2018/022114D-AR1 \_\_\_\_\_

Manuscript Title Endovascular Thrombectomy for Mild Strokes: How Low Should We Go? A Multicenter Cohort Study

### Former Authorship

Please list ALL AUTHORS in the same order as the original submission. For more than 12, use an extra sheet.

#### Print Name

Name (1) Amrou Sarraj  
Name (2) Ameer Hassan  
Name (3) Sean I Savitz  
Name (4) James C Grotta  
Name (5) Kaushik N Parsha  
Name (6) Christine M Farrell

#### Print Name

Name (7) Bitra Imam  
Name (8) Clark W Sitton  
Name (9) Haris Kamal  
Name (10) Nitin Goyal  
Name (11) Lucas Elijevich  
Name (12) Katelin Reishus

### New Authorship

All authors must sign below agreeing to the changes in authorship. The authorship order must reflect the authorship order of the manuscript.

|                                     |                                                                                                       |                      |
|-------------------------------------|-------------------------------------------------------------------------------------------------------|----------------------|
| Name (1) <u>Amrou Sarraj</u>        | Signature <u>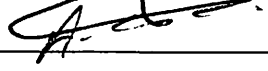</u> | Date <u>8.8.2018</u> |
| Name (2) <u>Ameer Hassan</u>        | Signature _____                                                                                       | Date _____           |
| Name (3) <u>Sean I Savitz</u>       | Signature _____                                                                                       | Date _____           |
| Name (4) <u>James C Grotta</u>      | Signature _____                                                                                       | Date _____           |
| Name (5) <u>Chunyan Cai</u>         | Signature _____                                                                                       | Date _____           |
| Name (6) <u>Kaushik N Parsha</u>    | Signature _____                                                                                       | Date _____           |
| Name (7) <u>Christine M Farrell</u> | Signature _____                                                                                       | Date _____           |
| Name (8) <u>Bitra Imam</u>          | Signature <u></u> | Date <u>8.8.2018</u> |
| Name (9) <u>Clark W Sitton</u>      | Signature _____                                                                                       | Date _____           |
| Name (10) <u>Sujan T Reddy</u>      | Signature <u></u>  | Date <u>8.8.2018</u> |
| Name (11) <u>Haris Kamal</u>        | Signature _____                                                                                       | Date <u>8/8/2018</u> |
| Name (12) <u>Nitin Goyal</u>        | Signature <u></u> | Date _____           |

Please scan and email to [stroke@strokeahajournal.org](mailto:stroke@strokeahajournal.org).



**Manuscript Nubmer:** STROKE/2018/022114D-AR1

**Manuscript Title:** Endovascular Thrombectomy for Mild Strokes: How Low Should We Go? A Multicenter Cohort Study

**Former Authorship Continued:**

**Print Name**

Name (13) Rashi Krishnan  
Name (14) Navdeep Sangha  
Name (15) Abel Wu  
Name (16) Renata Costa  
Name (17) Ruqayyah Malik  
Name (18) Chunyan Cai  
Name (19) Osman Mir  
Name (20) Rashedul Hasan

**Print Name**

Name (21) Lindsay M Snodgrass  
Name (22) Manuel Requena  
Name (23) Dion Graybeal  
Name (24) Michael Abraham  
Name (25) Michael Chen  
Name (26) Louise D McCullough  
Name (27) Marc Ribo

**New Authorship**

All authors must sign below agreeing to the changes in authorship. The authorship order must reflect the authorship order of the manuscript.

**New Authorship Continued:**

**Print Name**

|                               |                 |            |
|-------------------------------|-----------------|------------|
| Name (13) Lucas Elijevich     | Signature _____ | Date _____ |
| Name (14) Katelin Reishus     | Signature _____ | Date _____ |
| Name (15) Rashi Krishnan      | Signature _____ | Date _____ |
| Name (16) Navdeep Sangha      | Signature _____ | Date _____ |
| Name (17) Abel Wu             | Signature _____ | Date _____ |
| Name (18) Renata Costa        | Signature _____ | Date _____ |
| Name (19) Ruqayyah Malik      | Signature _____ | Date _____ |
| Name (20) Osman Mir           | Signature _____ | Date _____ |
| Name (21) Rashedul Hasan      | Signature _____ | Date _____ |
| Name (22) Lindsay M Snodgrass | Signature _____ | Date _____ |
| Name (23) Manuel Requena      | Signature _____ | Date _____ |
| Name (24) Dion Graybeal       | Signature _____ | Date _____ |
| Name (25) Michael Abraham     | Signature _____ | Date _____ |
| Name (26) Michael Chen        | Signature _____ | Date _____ |
| Name (27) Louise D McCullough | Signature _____ | Date _____ |
| Name (28) Marc Ribo           | Signature _____ | Date _____ |

## Change of Authorship Form

(Must be completed and signed by ALL authors)

Please check all that apply

New author(s) have been added (in addition to this form, all new authors must complete the copyright transfer agreement and conflict of interest disclosure.

Change in order of authorship.

\_\_\_\_\_ An author wishes to remove his/her name. An author's name may only be removed his/her own request and a letter signed by the author should accompany this form

Manuscript Number STROKE/2018/022114D-AR1

Manuscript Title Endovascular Thrombectomy for Mild Strokes: How Low Should We Go? A Multicenter Cohort Study

### Former Authorship

Please list ALL AUTHORS in the same order as the original submission. For more than 12, use an extra sheet.

#### Print Name

Name (1) Amrou Sarraj  
Name (2) Ameer Hassan  
Name (3) Sean I Savitz  
Name (4) James C Grotta  
Name (5) Kaushik N Parsha  
Name (6) Christine M Farrell

#### Print Name

Name (7) Bitra Imam  
Name (8) Clark W Sitton  
Name (9) Haris Kamal  
Name (10) Nitin Goyal  
Name (11) Lucas Elijevich  
Name (12) Katelin Reishus

### New Authorship

All authors must sign below agreeing to the changes in authorship. The authorship order must reflect the authorship order of the manuscript.

|                                     |                                                                                                       |                      |
|-------------------------------------|-------------------------------------------------------------------------------------------------------|----------------------|
| Name (1) <u>Amrou Sarraj</u>        | Signature <u></u> | Date <u>8.8.2018</u> |
| Name (2) <u>Ameer Hassan</u>        | Signature _____                                                                                       | Date _____           |
| Name (3) <u>Sean I Savitz</u>       | Signature _____                                                                                       | Date _____           |
| Name (4) <u>James C Grotta</u>      | Signature _____                                                                                       | Date _____           |
| Name (5) <u>Chunyan Cai</u>         | Signature _____                                                                                       | Date _____           |
| Name (6) <u>Kaushik N Parsha</u>    | Signature <u></u> | Date <u>8/9/2018</u> |
| Name (7) <u>Christine M Farrell</u> | Signature _____                                                                                       | Date _____           |
| Name (8) <u>Bitra Imam</u>          | Signature <u></u>  | Date <u>8.8.2018</u> |
| Name (9) <u>Clark W Sitton</u>      | Signature _____                                                                                       | Date _____           |
| Name (10) <u>Sujan T Reddy</u>      | Signature <u></u>  | Date <u>8.8.2018</u> |
| Name (11) <u>Haris Kamal</u>        | Signature _____                                                                                       | Date _____           |
| Name (12) <u>Nitin Goyal</u>        | Signature _____                                                                                       | Date _____           |

Please scan and email to [stroke@strokeahajournal.org](mailto:stroke@strokeahajournal.org).

**Manuscript Nubmer:** STROKE/2018/022114D-AR1

**Manuscript Title:** Endovascular Thrombectomy for Mild Strokes: How Low Should We Go? A Multicenter Cohort Study

**Former Authorship Continued:**

**Print Name**

Name (13) Rashi Krishnan  
Name (14) Navdeep Sangha  
Name (15) Abel Wu  
Name (16) Renata Costa  
Name (17) Ruqayyah Malik  
Name (18) Chunyan Cai  
Name (19) Osman Mir  
Name (20) Rashedul Hasan

**Print Name**

Name (21) Lindsay M Snodgrass  
Name (22) Manuel Requena  
Name (23) Dion Graybeal  
Name (24) Michael Abraham  
Name (25) Michael Chen  
Name (26) Louise D McCullough  
Name (27) Marc Ribo

**New Authorship**

All authors must sign below agreeing to the changes in authorship. The authorship order must reflect the authorship order of the manuscript.

**New Authorship Continued:**

**Print Name**

|                               |                                                                                               |                     |
|-------------------------------|-----------------------------------------------------------------------------------------------|---------------------|
| Name (13) Lucas Elijovich     | Signature _____                                                                               | Date _____          |
| Name (14) Katelin Reishus     | Signature _____                                                                               | Date _____          |
| Name (15) Rashi Krishnan      | Signature _____                                                                               | Date _____          |
| Name (16) Navdeep Sangha      | Signature _____                                                                               | Date _____          |
| Name (17) Abel Wu             | Signature _____                                                                               | Date _____          |
| Name (18) Renata Costa        | Signature _____                                                                               | Date _____          |
| Name (19) Ruqayyah Malik      | Signature _____                                                                               | Date _____          |
| Name (20) Osman Mir           | Signature _____                                                                               | Date _____          |
| Name (21) Rashedul Hasan      | Signature _____                                                                               | Date _____          |
| Name (22) Lindsay M Snodgrass | Signature _____                                                                               | Date _____          |
| Name (23) Manuel Requena      | Signature 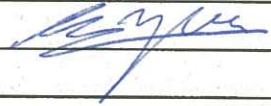 | Date <u>8.10.18</u> |
| Name (24) Dion Graybeal       | Signature _____                                                                               | Date _____          |
| Name (25) Michael Abraham     | Signature _____                                                                               | Date _____          |
| Name (26) Michael Chen        | Signature _____                                                                               | Date _____          |
| Name (27) Louise D McCullough | Signature _____                                                                               | Date _____          |
| Name (28) Marc Ribo           | Signature _____                                                                               | Date _____          |

## Change of Authorship Form

(Must be completed and signed by ALL authors)

Please check all that apply

New author(s) have been added (in addition to this form, all new authors must complete the copyright transfer agreement and conflict of interest disclosure.

Change in order of authorship.

An author wishes to remove his/her name. An author's name may only be removed his/her own request and a letter signed by the author should accompany this form

Manuscript Number STROKE/2018/022114D-AR1 \_\_\_\_\_

Manuscript Title Endovascular Thrombectomy for Mild Strokes: How Low Should We Go? A Multicenter Cohort Study

### Former Authorship

Please list ALL AUTHORS in the same order as the original submission. For more than 12, use an extra sheet.

#### Print Name

Name (1) Amrou Sarraj  
Name (2) Ameer Hassan  
Name (3) Sean I Savitz  
Name (4) James C Grotta  
Name (5) Kaushik N Parsha  
Name (6) Christine M Farrell

#### Print Name

Name (7) Bitra Imam  
Name (8) Clark W Sitton  
Name (9) Haris Kamal  
Name (10) Nitin Goyal  
Name (11) Lucas Elijevich  
Name (12) Katelin Reishus

### New Authorship

All authors must sign below agreeing to the changes in authorship. The authorship order must reflect the authorship order of the manuscript.

|                                     |                                                                                                       |                      |
|-------------------------------------|-------------------------------------------------------------------------------------------------------|----------------------|
| Name (1) <u>Amrou Sarraj</u>        | Signature <u></u> | Date <u>8.8.2018</u> |
| Name (2) <u>Ameer Hassan</u>        | Signature _____                                                                                       | Date _____           |
| Name (3) <u>Sean I Savitz</u>       | Signature _____                                                                                       | Date _____           |
| Name (4) <u>James C Grotta</u>      | Signature _____                                                                                       | Date _____           |
| Name (5) <u>Chunyan Cai</u>         | Signature _____                                                                                       | Date _____           |
| Name (6) <u>Kaushik N Parsha</u>    | Signature _____                                                                                       | Date _____           |
| Name (7) <u>Christine M Farrell</u> | Signature _____                                                                                       | Date _____           |
| Name (8) <u>Bitra Imam</u>          | Signature <u></u> | Date <u>8.8.2018</u> |
| Name (9) <u>Clark W Sitton</u>      | Signature _____                                                                                       | Date _____           |
| Name (10) <u>Sujan T Reddy</u>      | Signature <u></u>  | Date <u>8.8.2018</u> |
| Name (11) <u>Haris Kamal</u>        | Signature _____                                                                                       | Date _____           |
| Name (12) <u>Nitin Goyal</u>        | Signature _____                                                                                       | Date _____           |

Please scan and email to [stroke@strokeahajournal.org](mailto:stroke@strokeahajournal.org).

**Manuscript Nubmer:** STROKE/2018/022114D-AR1

**Manuscript Title:** Endovascular Thrombectomy for Mild Strokes: How Low Should We Go? A Multicenter Cohort Study

**Former Authorship Continued:**

**Print Name**

Name (13) Rashi Krishnan  
Name (14) Navdeep Sangha  
Name (15) Abel Wu  
Name (16) Renata Costa  
Name (17) Ruqayyah Malik  
Name (18) Chunyan Cai  
Name (19) Osman Mir  
Name (20) Rashedul Hasan

**Print Name**

Name (21) Lindsay M Snodgrass  
Name (22) Manuel Requena  
Name (23) Dion Graybeal  
Name (24) Michael Abraham  
Name (25) Michael Chen  
Name (26) Louise D McCullough  
Name (27) Marc Ribo

**New Authorship**

All authors must sign below agreeing to the changes in authorship. The authorship order must reflect the authorship order of the manuscript.

**New Authorship Continued:**

**Print Name**

|                               |                                                                                                     |                         |
|-------------------------------|-----------------------------------------------------------------------------------------------------|-------------------------|
| Name (13) Lucas Elijevich     | Signature _____                                                                                     | Date _____              |
| Name (14) Katelin Reishus     | Signature _____                                                                                     | Date _____              |
| Name (15) Rashi Krishnan      | Signature _____                                                                                     | Date _____              |
| Name (16) Navdeep Sangha      | Signature _____                                                                                     | Date _____              |
| Name (17) Abel Wu             | Signature _____                                                                                     | Date _____              |
| Name (18) Renata Costa        | Signature _____                                                                                     | Date _____              |
| Name (19) Ruqayyah Malik      | Signature _____                                                                                     | Date _____              |
| Name (20) Osman Mir           | Signature _____                                                                                     | Date _____              |
| Name (21) Rashedul Hasan      | Signature _____                                                                                     | Date _____              |
| Name (22) Lindsay M Snodgrass | Signature _____                                                                                     | Date _____              |
| Name (23) Manuel Requena      | Signature _____                                                                                     | Date _____              |
| Name (24) Dion Graybeal       | Signature _____                                                                                     | Date _____              |
| Name (25) Michael Abraham     | Signature _____                                                                                     | Date _____              |
| Name (26) Michael Chen        | Signature _____                                                                                     | Date _____              |
| Name (27) Louise D McCullough | Signature _____                                                                                     | Date _____              |
| Name (28) Marc Ribo           | Signature  _____ | Date <u>Aug 9, 2018</u> |

## Change of Authorship Form

(Must be completed and signed by ALL authors)

Please check all that apply

New author(s) have been added (in addition to this form, all new authors must complete the copyright transfer agreement and conflict of interest disclosure.

Change in order of authorship.

An author wishes to remove his/her name. An author's name may only be removed his/her own request and a letter signed by the author should accompany this form

Manuscript Number STROKE/2018/022114D-AR1

Manuscript Title Endovascular Thrombectomy for Mild Strokes: How Low Should We Go? A Multicenter Cohort Study

### Former Authorship

Please list ALL AUTHORS in the same order as the original submission. For more than 12, use an extra sheet.

#### Print Name

Name (1) Amrou Sarraj  
Name (2) Ameer Hassan  
Name (3) Sean I Savitz  
Name (4) James C Grotta  
Name (5) Kaushik N Parsha  
Name (6) Christine M Farrell

#### Print Name

Name (7) Bitra Imam  
Name (8) Clark W Sitton  
Name (9) Haris Kamal  
Name (10) Nitin Goyal  
Name (11) Lucas Elijovich  
Name (12) Katelin Reishus

### New Authorship

All authors must sign below agreeing to the changes in authorship. The authorship order must reflect the authorship order of the manuscript.

|                                     |                                                                                                       |                      |
|-------------------------------------|-------------------------------------------------------------------------------------------------------|----------------------|
| Name (1) <u>Amrou Sarraj</u>        | Signature <u></u> | Date <u>8.8.2018</u> |
| Name (2) <u>Ameer Hassan</u>        | Signature _____                                                                                       | Date _____           |
| Name (3) <u>Sean I Savitz</u>       | Signature _____                                                                                       | Date _____           |
| Name (4) <u>James C Grotta</u>      | Signature _____                                                                                       | Date _____           |
| Name (5) <u>Chunyan Cai</u>         | Signature _____                                                                                       | Date _____           |
| Name (6) <u>Kaushik N Parsha</u>    | Signature _____                                                                                       | Date _____           |
| Name (7) <u>Christine M Farrell</u> | Signature _____                                                                                       | Date _____           |
| Name (8) <u>Bitra Imam</u>          | Signature <u></u>  | Date <u>8.8.2018</u> |
| Name (9) <u>Clark W Sitton</u>      | Signature _____                                                                                       | Date _____           |
| Name (10) <u>Sujan T Reddy</u>      | Signature <u></u>  | Date <u>8.8.2018</u> |
| Name (11) <u>Haris Kamal</u>        | Signature _____                                                                                       | Date _____           |
| Name (12) <u>Nitin Goyal</u>        | Signature _____                                                                                       | Date _____           |

Please scan and email to [stroke@strokeahajournal.org](mailto:stroke@strokeahajournal.org).

Manuscript Number: STROKE/2018/022114D-AR1

Manuscript Title: Endovascular Thrombectomy for Mild Strokes: How Low Should We Go? A Multicenter Cohort Study

**Former Authorship Continued:**

**Print Name**

Name (13) Rashi Krishnan  
Name (14) Navdeep Sangha  
Name (15) Abel Wu  
Name (16) Renata Costa  
Name (17) Ruqayyah Malik  
Name (18) Chunyan Cai  
Name (19) Osman Mir  
Name (20) Rashedul Hasan

**Print Name**

Name (21) Lindsay M Snodgrass  
Name (22) Manuel Requena  
Name (23) Dion Graybeal  
Name (24) Michael Abraham  
Name (25) Michael Chen  
Name (26) Louise D McCullough  
Name (27) Marc Ribo

**New Authorship**

All authors must sign below agreeing to the changes in authorship. The authorship order must reflect the authorship order of the manuscript.

**New Authorship Continued:**

**Print Name**

|                               |                                                                                               |                |
|-------------------------------|-----------------------------------------------------------------------------------------------|----------------|
| Name (13) Lucas Elijovich     | Signature _____                                                                               | Date _____     |
| Name (14) Katelin Reishus     | Signature _____                                                                               | Date _____     |
| Name (15) Rashi Krishnan      | Signature _____                                                                               | Date _____     |
| Name (16) Navdeep Sangha      | Signature  | Date 8/10/2018 |
| Name (17) Abel Wu             | Signature _____                                                                               | Date _____     |
| Name (18) Renata Costa        | Signature _____                                                                               | Date _____     |
| Name (19) Ruqayyah Malik      | Signature _____                                                                               | Date _____     |
| Name (20) Osman Mir           | Signature _____                                                                               | Date _____     |
| Name (21) Rashedul Hasan      | Signature _____                                                                               | Date _____     |
| Name (22) Lindsay M Snodgrass | Signature _____                                                                               | Date _____     |
| Name (23) Manuel Requena      | Signature _____                                                                               | Date _____     |
| Name (24) Dion Graybeal       | Signature _____                                                                               | Date _____     |
| Name (25) Michael Abraham     | Signature _____                                                                               | Date _____     |
| Name (26) Michael Chen        | Signature _____                                                                               | Date _____     |
| Name (27) Louise D McCullough | Signature _____                                                                               | Date _____     |
| Name (28) Marc Ribo           | Signature _____                                                                               | Date _____     |

## Change of Authorship Form

(Must be completed and signed by ALL authors)

Please check all that apply

New author(s) have been added (in addition to this form, all new authors must complete the copyright transfer agreement and conflict of interest disclosure.

Change in order of authorship.

An author wishes to remove his/her name. An author's name may only be removed his/her own request and a letter signed by the author should accompany this form

Manuscript Number STROKE/2018/022114D-AR1

Manuscript Title Endovascular Thrombectomy for Mild Strokes: How Low Should We Go? A Multicenter Cohort Study

### Former Authorship

Please list ALL AUTHORS in the same order as the original submission. For more than 12, use an extra sheet.

#### Print Name

Name (1) Amrou Sarraj  
Name (2) Ameer Hassan  
Name (3) Sean I Savitz  
Name (4) James C Grotta  
Name (5) Kaushik N Parsha  
Name (6) Christine M Farrell

#### Print Name

Name (7) Bita Imam  
Name (8) Clark W Sitton  
Name (9) Haris Kamal  
Name (10) Nitin Goyal  
Name (11) Lucas Elijevich  
Name (12) Katelin Reishus

### New Authorship

All authors must sign below agreeing to the changes in authorship. The authorship order must reflect the authorship order of the manuscript.

|                                     |                                                                                                       |                       |
|-------------------------------------|-------------------------------------------------------------------------------------------------------|-----------------------|
| Name (1) <u>Amrou Sarraj</u>        | Signature <u></u> | Date <u>8.8.2018</u>  |
| Name (2) <u>Ameer Hassan</u>        | Signature _____                                                                                       | Date _____            |
| Name (3) <u>Sean I Savitz</u>       | Signature <u></u> | Date <u>8-10-2018</u> |
| Name (4) <u>James C Grotta</u>      | Signature _____                                                                                       | Date _____            |
| Name (5) <u>Chunyan Cai</u>         | Signature _____                                                                                       | Date _____            |
| Name (6) <u>Kaushik N Parsha</u>    | Signature _____                                                                                       | Date _____            |
| Name (7) <u>Christine M Farrell</u> | Signature _____                                                                                       | Date _____            |
| Name (8) <u>Bita Imam</u>           | Signature <u></u>  | Date <u>8.8.2018</u>  |
| Name (9) <u>Clark W Sitton</u>      | Signature _____                                                                                       | Date _____            |
| Name (10) <u>Sujan T Reddy</u>      | Signature <u></u>  | Date <u>8.8.2018</u>  |
| Name (11) <u>Haris Kamal</u>        | Signature _____                                                                                       | Date _____            |
| Name (12) <u>Nitin Goyal</u>        | Signature _____                                                                                       | Date _____            |

Please scan and email to [stroke@strokeahajournal.org](mailto:stroke@strokeahajournal.org).



**Manuscript Nubmer: STROKE/2018/022114D-AR1**

**Manuscript Title: Endovascular Thrombectomy for Mild Strokes: How Low Should We Go? A Multicenter Cohort Study**

**Former Authorship Continued:**

**Print Name**

Name (13) Rashi Krishnan  
Name (14) Navdeep Sangha  
Name (15) Abel Wu  
Name (16) Renata Costa  
Name (17) Ruqayyah Malik  
Name (18) Chunyan Cai  
Name (19) Osman Mir  
Name (20) Rashedul Hasan

**Print Name**

Name (21) Lindsay M Snodgrass  
Name (22) Manuel Requena  
Name (23) Dion Graybeal  
Name (24) Michael Abraham  
Name (25) Michael Chen  
Name (26) Louise D McCullough  
Name (27) Marc Ribo

**New Authorship**

All authors must sign below agreeing to the changes in authorship. The authorship order must reflect the authorship order of the manuscript.

**New Authorship Continued:**

**Print Name**

|                               |                 |            |
|-------------------------------|-----------------|------------|
| Name (13) Lucas Eljovich      | Signature _____ | Date _____ |
| Name (14) Katelin Reishus     | Signature _____ | Date _____ |
| Name (15) Rashi Krishnan      | Signature _____ | Date _____ |
| Name (16) Navdeep Sangha      | Signature _____ | Date _____ |
| Name (17) Abel Wu             | Signature _____ | Date _____ |
| Name (18) Renata Costa        | Signature _____ | Date _____ |
| Name (19) Ruqayyah Mallk      | Signature _____ | Date _____ |
| Name (20) Osman Mir           | Signature _____ | Date _____ |
| Name (21) Rashedul Hasan      | Signature _____ | Date _____ |
| Name (22) Lindsay M Snodgrass | Signature _____ | Date _____ |
| Name (23) Manuel Requena      | Signature _____ | Date _____ |
| Name (24) Dion Graybeal       | Signature _____ | Date _____ |
| Name (25) Michael Abraham     | Signature _____ | Date _____ |
| Name (26) Michael Chen        | Signature _____ | Date _____ |
| Name (27) Louise D McCullough | Signature _____ | Date _____ |
| Name (28) Marc Ribo           | Signature _____ | Date _____ |

## Change of Authorship Form

(Must be completed and signed by ALL authors)

Please check all that apply

New author(s) have been added (in addition to this form, all new authors must complete the copyright transfer agreement and conflict of interest disclosure.

Change in order of authorship.

An author wishes to remove his/her name. An author's name may only be removed his/her own request and a letter signed by the author should accompany this form

Manuscript Number STROKE/2018/022114D-AR1 \_\_\_\_\_

Manuscript Title Endovascular Thrombectomy for Mild Strokes: How Low Should We Go? A Multicenter Cohort Study

### Former Authorship

Please list ALL AUTHORS in the same order as the original submission. For more than 12, use an extra sheet.

#### Print Name

Name (1) Amrou Sarraj  
Name (2) Ameer Hassan  
Name (3) Sean I Savitz  
Name (4) James C Grotta  
Name (5) Kaushik N Parsha  
Name (6) Christine M Farrell

#### Print Name

Name (7) Bitra Imam  
Name (8) Clark W Sitton  
Name (9) Haris Kamal  
Name (10) Nitin Goyal  
Name (11) Lucas Elijevich  
Name (12) Katelin Reishus

### New Authorship

All authors must sign below agreeing to the changes in authorship. The authorship order must reflect the authorship order of the manuscript.

|                                     |                                                                                                       |                      |
|-------------------------------------|-------------------------------------------------------------------------------------------------------|----------------------|
| Name (1) <u>Amrou Sarraj</u>        | Signature <u></u> | Date <u>8.8.2018</u> |
| Name (2) <u>Ameer Hassan</u>        | Signature _____                                                                                       | Date _____           |
| Name (3) <u>Sean I Savitz</u>       | Signature _____                                                                                       | Date _____           |
| Name (4) <u>James C Grotta</u>      | Signature _____                                                                                       | Date _____           |
| Name (5) <u>Chunyan Cai</u>         | Signature _____                                                                                       | Date _____           |
| Name (6) <u>Kaushik N Parsha</u>    | Signature _____                                                                                       | Date _____           |
| Name (7) <u>Christine M Farrell</u> | Signature _____                                                                                       | Date _____           |
| Name (8) <u>Bitra Imam</u>          | Signature <u></u> | Date <u>8.8.2018</u> |
| Name (9) <u>Clark W Sitton</u>      | Signature _____                                                                                       | Date _____           |
| Name (10) <u>Sujan T Reddy</u>      | Signature <u></u>  | Date <u>8.8.2018</u> |
| Name (11) <u>Haris Kamal</u>        | Signature _____                                                                                       | Date _____           |
| Name (12) <u>Nitin Goyal</u>        | Signature _____                                                                                       | Date _____           |

Please scan and email to [stroke@strokeahajournal.org](mailto:stroke@strokeahajournal.org).

**Manuscript Nubmer:** STROKE/2018/022114D-AR1

**Manuscript Title:** Endovascular Thrombectomy for Mild Strokes: How Low Should We Go? A Multicenter Cohort Study

**Former Authorship Continued:**

**Print Name**

Name (13) Rashi Krishnan  
Name (14) Navdeep Sangha  
Name (15) Abel Wu  
Name (16) Renata Costa  
Name (17) Ruqayyah Malik  
Name (18) Chunyan Cai  
Name (19) Osman Mir  
Name (20) Rashedul Hasan

**Print Name**

Name (21) Lindsay M Snodgrass  
Name (22) Manuel Requena  
Name (23) Dion Graybeal  
Name (24) Michael Abraham  
Name (25) Michael Chen  
Name (26) Louise D McCullough  
Name (27) Marc Ribo

**New Authorship**

All authors must sign below agreeing to the changes in authorship. The authorship order must reflect the authorship order of the manuscript.

**New Authorship Continued:**

**Print Name**

|                               |                                                                                                     |             |
|-------------------------------|-----------------------------------------------------------------------------------------------------|-------------|
| Name (13) Lucas Elijevich     | Signature _____                                                                                     | Date _____  |
| Name (14) Katelin Reishus     | Signature _____                                                                                     | Date _____  |
| Name (15) Rashi Krishnan      | Signature _____                                                                                     | Date _____  |
| Name (16) Navdeep Sangha      | Signature _____                                                                                     | Date _____  |
| Name (17) Abel Wu             | Signature _____                                                                                     | Date _____  |
| Name (18) Renata Costa        | Signature _____                                                                                     | Date _____  |
| Name (19) Ruqayyah Malik      | Signature _____                                                                                     | Date _____  |
| Name (20) Osman Mir           | Signature _____                                                                                     | Date _____  |
| Name (21) Rashedul Hasan      | Signature _____                                                                                     | Date _____  |
| Name (22) Lindsay M Snodgrass | Signature 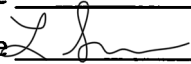 _____ | Date 8-9-18 |
| Name (23) Manuel Requena      | Signature _____                                                                                     | Date _____  |
| Name (24) Dion Graybeal       | Signature _____                                                                                     | Date _____  |
| Name (25) Michael Abraham     | Signature _____                                                                                     | Date _____  |
| Name (26) Michael Chen        | Signature _____                                                                                     | Date _____  |
| Name (27) Louise D McCullough | Signature _____                                                                                     | Date _____  |
| Name (28) Marc Ribo           | Signature _____                                                                                     | Date _____  |

# Change of Authorship Form

(Must be completed and signed by ALL authors)

Please check all that apply

New author(s) have been added (in addition to this form, all new authors must complete the copyright transfer agreement and conflict of interest disclosure.

Change in order of authorship.

An author wishes to remove his/her name. An author's name may only be removed his/her own request and a letter signed by the author should accompany this form

Manuscript Number STROKE/2018/022114D-AR1 \_\_\_\_\_

Manuscript Title Endovascular Thrombectomy for Mild Strokes: How Low Should We Go? A Multicenter Cohort Study

## Former Authorship

Please list ALL AUTHORS in the same order as the original submission. For more than 12, use an extra sheet.

### Print Name

Name (1) Amrou Sarraj  
Name (2) Ameer Hassan  
Name (3) Sean I Savitz  
Name (4) James C Grotta  
Name (5) Kaushik N Parsha  
Name (6) Christine M Farrell

### Print Name

Name (7) Bitra Imam  
Name (8) Clark W Sitton  
Name (9) Haris Kamal  
Name (10) Nitin Goyal  
Name (11) Lucas Elijevich  
Name (12) Katelin Reishus

## New Authorship

All authors must sign below agreeing to the changes in authorship. The authorship order must reflect the authorship order of the manuscript.

|                                     |                                                                                                       |                      |
|-------------------------------------|-------------------------------------------------------------------------------------------------------|----------------------|
| Name (1) <u>Amrou Sarraj</u>        | Signature <u></u> | Date <u>8.8.2018</u> |
| Name (2) <u>Ameer Hassan</u>        | Signature <u></u> | Date <u>8/8/2018</u> |
| Name (3) <u>Sean I Savitz</u>       | Signature _____                                                                                       | Date _____           |
| Name (4) <u>James C Grotta</u>      | Signature _____                                                                                       | Date _____           |
| Name (5) <u>Chunyan Cai</u>         | Signature _____                                                                                       | Date _____           |
| Name (6) <u>Kaushik N Parsha</u>    | Signature _____                                                                                       | Date _____           |
| Name (7) <u>Christine M Farrell</u> | Signature _____                                                                                       | Date _____           |
| Name (8) <u>Bitra Imam</u>          | Signature <u></u> | Date <u>8.8.2018</u> |
| Name (9) <u>Clark W Sitton</u>      | Signature _____                                                                                       | Date _____           |
| Name (10) <u>Sujan T Reddy</u>      | Signature <u></u>  | Date <u>8.8.2018</u> |
| Name (11) <u>Haris Kamal</u>        | Signature _____                                                                                       | Date _____           |
| Name (12) <u>Nitin Goyal</u>        | Signature _____                                                                                       | Date _____           |

Please scan and email to [stroke@strokeahajournal.org](mailto:stroke@strokeahajournal.org).

**Manuscript Nubmer:** STROKE/2018/022114D-AR1

**Manuscript Title:** Endovascular Thrombectomy for Mild Strokes: How Low Should We Go? A Multicenter Cohort Study

**Former Authorship Continued:**

**Print Name**

Name (13) Rashi Krishnan  
Name (14) Navdeep Sangha  
Name (15) Abel Wu  
Name (16) Renata Costa  
Name (17) Ruqayyah Malik  
Name (18) Chunyan Cai  
Name (19) Osman Mir  
Name (20) Rashedul Hasan

**Print Name**

Name (21) Lindsay M Snodgrass  
Name (22) Manuel Requena  
Name (23) Dion Graybeal  
Name (24) Michael Abraham  
Name (25) Michael Chen  
Name (26) Louise D McCullough  
Name (27) Marc Ribo

**New Authorship**

All authors must sign below agreeing to the changes in authorship. The authorship order must reflect the authorship order of the manuscript.

**New Authorship Continued:**

**Print Name**

|                               |                 |            |
|-------------------------------|-----------------|------------|
| Name (13) Lucas Elijevich     | Signature _____ | Date _____ |
| Name (14) Katelin Reishus     | Signature _____ | Date _____ |
| Name (15) Rashi Krishnan      | Signature _____ | Date _____ |
| Name (16) Navdeep Sangha      | Signature _____ | Date _____ |
| Name (17) Abel Wu             | Signature _____ | Date _____ |
| Name (18) Renata Costa        | Signature _____ | Date _____ |
| Name (19) Ruqayyah Malik      | Signature _____ | Date _____ |
| Name (20) Osman Mir           | Signature _____ | Date _____ |
| Name (21) Rashedul Hasan      | Signature _____ | Date _____ |
| Name (22) Lindsay M Snodgrass | Signature _____ | Date _____ |
| Name (23) Manuel Requena      | Signature _____ | Date _____ |
| Name (24) Dion Graybeal       | Signature _____ | Date _____ |
| Name (25) Michael Abraham     | Signature _____ | Date _____ |
| Name (26) Michael Chen        | Signature _____ | Date _____ |
| Name (27) Louise D McCullough | Signature _____ | Date _____ |
| Name (28) Marc Ribo           | Signature _____ | Date _____ |



## Change of Authorship Form

(Must be completed and signed by ALL authors)

Please check all that apply

New author(s) have been added (in addition to this form, all new authors must complete the copyright transfer agreement and conflict of interest disclosure.

Change in order of authorship.

An author wishes to remove his/her name. An author's name may only be removed his/her own request and a letter signed by the author should accompany this form

Manuscript Number STROKE/2018/022114D-AR1 \_\_\_\_\_

Manuscript Title Endovascular Thrombectomy for Mild Strokes: How Low Should We Go? A Multicenter Cohort Study

### Former Authorship

Please list ALL AUTHORS in the same order as the original submission. For more than 12, use an extra sheet.

#### Print Name

Name (1) Amrou Sarraj  
Name (2) Ameer Hassan  
Name (3) Sean I Savitz  
Name (4) James C Grotta  
Name (5) Kaushik N Parsha  
Name (6) Christine M Farrell

#### Print Name

Name (7) Bitra Imam  
Name (8) Clark W Sitton  
Name (9) Haris Kamal  
Name (10) Nitin Goyal  
Name (11) Lucas Elijevich  
Name (12) Katelin Reishus

### New Authorship

All authors must sign below agreeing to the changes in authorship. The authorship order must reflect the authorship order of the manuscript.

|                                     |                                                                                                       |                      |
|-------------------------------------|-------------------------------------------------------------------------------------------------------|----------------------|
| Name (1) <u>Amrou Sarraj</u>        | Signature <u></u> | Date <u>8.8.2018</u> |
| Name (2) <u>Ameer Hassan</u>        | Signature _____                                                                                       | Date _____           |
| Name (3) <u>Sean I Savitz</u>       | Signature _____                                                                                       | Date _____           |
| Name (4) <u>James C Grotta</u>      | Signature _____                                                                                       | Date _____           |
| Name (5) <u>Chunyan Cai</u>         | Signature _____                                                                                       | Date _____           |
| Name (6) <u>Kaushik N Parsha</u>    | Signature _____                                                                                       | Date _____           |
| Name (7) <u>Christine M Farrell</u> | Signature _____                                                                                       | Date _____           |
| Name (8) <u>Bitra Imam</u>          | Signature <u></u> | Date <u>8.8.2018</u> |
| Name (9) <u>Clark W Sitton</u>      | Signature _____                                                                                       | Date _____           |
| Name (10) <u>Sujan T Reddy</u>      | Signature <u></u>  | Date <u>8.8.2018</u> |
| Name (11) <u>Haris Kamal</u>        | Signature _____                                                                                       | Date _____           |
| Name (12) <u>Nitin Goyal</u>        | Signature _____                                                                                       | Date _____           |

Please scan and email to [stroke@strokeahajournal.org](mailto:stroke@strokeahajournal.org).

**Manuscript Nubmer:** STROKE/2018/022114D-AR1

**Manuscript Title:** Endovascular Thrombectomy for Mild Strokes: How Low Should We Go? A Multicenter Cohort Study

**Former Authorship Continued:**

**Print Name**

Name (13) Rashi Krishnan  
Name (14) Navdeep Sangha  
Name (15) Abel Wu  
Name (16) Renata Costa  
Name (17) Ruqayyah Malik  
Name (18) Chunyan Cai  
Name (19) Osman Mir  
Name (20) Rashedul Hasan

**Print Name**

Name (21) Lindsay M Snodgrass  
Name (22) Manuel Requena  
Name (23) Dion Graybeal  
Name (24) Michael Abraham  
Name (25) Michael Chen  
Name (26) Louise D McCullough  
Name (27) Marc Ribo

**New Authorship**

All authors must sign below agreeing to the changes in authorship. The authorship order must reflect the authorship order of the manuscript.

**New Authorship Continued:**

**Print Name**

|                               |                                 |             |
|-------------------------------|---------------------------------|-------------|
| Name (13) Lucas Elijevich     | Signature _____                 | Date _____  |
| Name (14) Katelin Reishus     | Signature _____                 | Date _____  |
| Name (15) Rashi Krishnan      | Signature _____                 | Date _____  |
| Name (16) Navdeep Sangha      | Signature _____                 | Date _____  |
| Name (17) Abel Wu             | Signature _____                 | Date _____  |
| Name (18) Renata Costa        | Signature _____                 | Date _____  |
| Name (19) Ruqayyah Malik      | Signature <i>Ruqayyah Malik</i> | Date 8/9/18 |
| Name (20) Osman Mir           | Signature _____                 | Date _____  |
| Name (21) Rashedul Hasan      | Signature _____                 | Date _____  |
| Name (22) Lindsay M Snodgrass | Signature _____                 | Date _____  |
| Name (23) Manuel Requena      | Signature _____                 | Date _____  |
| Name (24) Dion Graybeal       | Signature _____                 | Date _____  |
| Name (25) Michael Abraham     | Signature _____                 | Date _____  |
| Name (26) Michael Chen        | Signature _____                 | Date _____  |
| Name (27) Louise D McCullough | Signature _____                 | Date _____  |
| Name (28) Marc Ribo           | Signature _____                 | Date _____  |



## Change of Authorship Form

(Must be completed and signed by ALL authors)

Please check all that apply

New author(s) have been added (in addition to this form, all new authors must complete the copyright transfer agreement and conflict of interest disclosure.

Change in order of authorship.

An author wishes to remove his/her name. An author's name may only be removed his/her own request and a letter signed by the author should accompany this form

Manuscript Number STROKE/2018/022114D-AR1

Manuscript Title Endovascular Thrombectomy for Mild Strokes: How Low Should We Go? A Multicenter Cohort Study

### Former Authorship

Please list ALL AUTHORS in the same order as the original submission. For more than 12, use an extra sheet.

#### Print Name

Name (1) Amrou Sarraj  
Name (2) Ameer Hassan  
Name (3) Sean I Savitz  
Name (4) James C Grotta  
Name (5) Kaushik N Parsha  
Name (6) Christine M Farrell

#### Print Name

Name (7) Bitra Imam  
Name (8) Clark W Sitton  
Name (9) Haris Kamal  
Name (10) Nitin Goyal  
Name (11) Lucas Elijovich  
Name (12) Katelin Reishus

### New Authorship

All authors must sign below agreeing to the changes in authorship. The authorship order must reflect the authorship order of the manuscript.

|                                     |                                                                                                       |                      |
|-------------------------------------|-------------------------------------------------------------------------------------------------------|----------------------|
| Name (1) <u>Amrou Sarraj</u>        | Signature <u></u> | Date <u>8.8.2018</u> |
| Name (2) <u>Ameer Hassan</u>        | Signature _____                                                                                       | Date _____           |
| Name (3) <u>Sean I Savitz</u>       | Signature _____                                                                                       | Date _____           |
| Name (4) <u>James C Grotta</u>      | Signature _____                                                                                       | Date _____           |
| Name (5) <u>Chunyan Cai</u>         | Signature <u></u>  | Date <u>8.8.2018</u> |
| Name (6) <u>Kaushik N Parsha</u>    | Signature _____                                                                                       | Date _____           |
| Name (7) <u>Christine M Farrell</u> | Signature _____                                                                                       | Date _____           |
| Name (8) <u>Bitra Imam</u>          | Signature <u></u> | Date <u>8.8.2018</u> |
| Name (9) <u>Clark W Sitton</u>      | Signature <u></u> | Date <u>8-9-2018</u> |
| Name (10) <u>Sujan T Reddy</u>      | Signature <u></u>  | Date <u>8.8.2018</u> |
| Name (11) <u>Haris Kamal</u>        | Signature _____                                                                                       | Date _____           |
| Name (12) <u>Nitin Goyal</u>        | Signature _____                                                                                       | Date _____           |

Please scan and email to [stroke@strokeahajournal.org](mailto:stroke@strokeahajournal.org).

Manuscript Nubmer: STROKE/2018/022114D-AR1

Manuscript Title: Endovascular Thrombectomy for Mild Strokes: How Low Should We Go? A Multicenter Cohort Study

Former Authorship Continued:

Print Name

- Name (13) Rashi Krishnan
- Name (14) Navdeep Sangha
- Name (15) Abel Wu
- Name (16) Renata Costa
- Name (17) Ruqayyah Malik
- Name (18) Chunyan Cai
- Name (19) Osman Mir
- Name (20) Rashedul Hasan

Print Name

- Name (21) Lindsay M Snodgrass
- Name (22) Manuel Requena
- Name (23) Dion Graybeal
- Name (24) Michael Abraham
- Name (25) Michael Chen
- Name (26) Louise D McCullough
- Name (27) Marc Ribo

New Authorship

All authors must sign below agreeing to the changes in authorship. The authorship order must reflect the authorship order of the manuscript.

New Authorship Continued:

Print Name

- Name (13) Lucas Eljovich
- Name (14) Katelin Reishus
- Name (15) Rashi Krishnan
- Name (16) Navdeep Sangha
- Name (17) Abel Wu
- Name (18) Renata Costa
- Name (19) Ruqayyah Mallk
- Name (20) Osman Mir
- Name (21) Rashedul Hasan
- Name (22) Lindsay M Snodgrass
- Name (23) Manuel Requena
- Name (24) Dion Graybeal
- Name (25) Michael Abraham
- Name (26) Michael Chen
- Name (27) Louise D McCullough
- Name (28) Marc Ribo

Signature \_\_\_\_\_

Signature *[Handwritten Signature]* \_\_\_\_\_

Signature *[Handwritten Signature]* \_\_\_\_\_

Signature \_\_\_\_\_

Date *8/9/18*

Date *08/09/18*

Date \_\_\_\_\_

Date \_\_\_\_\_

Date *08/09/18*

Date \_\_\_\_\_

Date \_\_\_\_\_

Date \_\_\_\_\_

Date \_\_\_\_\_

## Change of Authorship Form

(Must be completed and signed by ALL authors)

Please check all that apply

New author(s) have been added (in addition to this form, all new authors must complete the copyright transfer agreement and conflict of interest disclosure.

Change in order of authorship.

An author wishes to remove his/her name. An author's name may only be removed his/her own request and a letter signed by the author should accompany this form

Manuscript Number STROKE/2018/022114D-AR1

Manuscript Title Endovascular Thrombectomy for Mild Strokes: How Low Should We Go? A Multicenter Cohort Study

### Former Authorship

Please list ALL AUTHORS in the same order as the original submission. For more than 12, use an extra sheet.

#### Print Name

Name (1) Amrou Sarraj  
 Name (2) Ameer Hassan  
 Name (3) Sean I Savitz  
 Name (4) James C Grotta  
 Name (5) Kaushik N Parsha  
 Name (6) Christine M Farrell

#### Print Name

Name (7) Bitra Imam  
 Name (8) Clark W Sitton  
 Name (9) Haris Kamal  
 Name (10) Nitin Goyal  
 Name (11) Lucas Eljovich  
 Name (12) Katelin Reishus

### New Authorship

All authors must sign below agreeing to the changes in authorship. The authorship order must reflect the authorship order of the manuscript.

|                                     |                                                                                                       |                      |
|-------------------------------------|-------------------------------------------------------------------------------------------------------|----------------------|
| Name (1) <u>Amrou Sarraj</u>        | Signature <u></u> | Date <u>8.8.2018</u> |
| Name (2) <u>Ameer Hassan</u>        | Signature _____                                                                                       | Date _____           |
| Name (3) <u>Sean I Savitz</u>       | Signature _____                                                                                       | Date _____           |
| Name (4) <u>James C Grotta</u>      | Signature _____                                                                                       | Date _____           |
| Name (5) <u>Chunyan Cai</u>         | Signature _____                                                                                       | Date _____           |
| Name (6) <u>Kaushik N Parsha</u>    | Signature _____                                                                                       | Date _____           |
| Name (7) <u>Christine M Farrell</u> | Signature _____                                                                                       | Date _____           |
| Name (8) <u>Bitra Imam</u>          | Signature <u></u>  | Date <u>8.8.2018</u> |
| Name (9) <u>Clark W Sitton</u>      | Signature _____                                                                                       | Date _____           |
| Name (10) <u>Sujan T Reddy</u>      | Signature <u></u>  | Date <u>8.8.2018</u> |
| Name (11) <u>Haris Kamal</u>        | Signature _____                                                                                       | Date _____           |
| Name (12) <u>Nitin Goyal</u>        | Signature _____                                                                                       | Date _____           |

Please scan and email to [stroke@strokeahajournal.org](mailto:stroke@strokeahajournal.org).
