# Supplementary material
Source: PubMed Central journal article supplement (PMC6209123)
Supplement: NIHMS1504020-supplement-Supplemental_Material.pdf [file NIHMS1504020-supplement-Supplemental_Material.pdf]

## Supplemental Material

**Table I.** Independent outcome rates (mRS 0-2), unadjusted and adjusted ORs, between EVT and medical management only stratified by thrombus location

| Thrombus Location    | Independent outcome (mRS 0-2) (%) |                    | Independent outcome (mRS 0-2) |         |                    |         |
|----------------------|-----------------------------------|--------------------|-------------------------------|---------|--------------------|---------|
|                      | EVT                               | Medical Management | <b>OR</b> (95% CI)            | P value | <b>aOR</b> (95%CI) | P value |
| All<br>(n=214)       | 63.3                              | 67.8               | 0.82 (0.43, 1.55)             | 0.54    | 0.90 (0.43, 1.88)  | 0.77    |
| M1<br>(n=89)         | 61.1                              | 47.6               | 1.73 (0.58, 5.17)             | 0.33    | 1.29 (0.39, 4.24)  | 0.67    |
| ICA<br>(n=33)        | 53.8                              | 41.7               | 1.63 (0.33, 8.05)             | 0.54    | 2.14 (0.37, 12.34) | 0.39    |
| Proximal*<br>(n=122) | 59.2                              | 45.5               | 1.74 (0.71, 4.27)             | 0.22    | 1.58 (0.60, 4.18)  | 0.35    |
| M2<br>(n=77)         | 75                                | 84.1               | 0.57 (0.17, 1.86)             | 0.35    | 0.55 (0.16, 1.91)  | 0.34    |

|                     |    |      |                   |      |                   |      |
|---------------------|----|------|-------------------|------|-------------------|------|
| M3/M4/ACA<br>(n=15) | 0  | 69.2 | -                 | -    | -                 | -    |
| Distal†<br>(n=92)   | 70 | 80.7 | 0.56 (0.20, 1.56) | 0.26 | 0.55 (0.19, 1.63) | 0.28 |

\*Proximal occlusions included M1+ICA; †Distal occlusions included M2+M3/M4/ACA

**Table II.** Baseline characteristics of propensity-matched patients in EVT and medical management

| <b>Variable</b>                               | <b>EVT<br/>N=62</b> | <b>Medical Management<br/>N=62</b> | <b>P value</b> |
|-----------------------------------------------|---------------------|------------------------------------|----------------|
| <b>Age, mean±SD</b>                           | 67.9±14.6           | 65.3±16.7                          | 0.36*          |
| <b>NIHSS at presentation, median (Q1, Q3)</b> | 4.0 (2.0, 5.0)      | 3.0 (2.0, 4.0)                     | 0.17‡          |
| <b>Wake up stroke, %</b>                      | 17.7                | 16.1                               | 0.81†          |
| <b>Transferred, %</b>                         | 32.3                | 33.9                               | 0.85†          |
| <b>IV-alteplase given, %</b>                  | 35.5                | 30.6                               | 0.57†          |
| <b>Thrombus location, %</b>                   |                     |                                    | 1.0§           |
| M1                                            | 33.9                | 32.3                               |                |
| M2                                            | 45.2                | 46.8                               |                |
| M3_M4_ACA                                     | 3.2                 | 3.2                                |                |
| ICA                                           | 17.8                | 17.8                               |                |
| <b>Onset to EVT arrival window, %</b>         |                     |                                    | 0.86†          |
| 0-6                                           | 51.6                | 53.2                               |                |
| 6-24 or UNK                                   | 48.4                | 46.8                               |                |

\*denotes p-values obtained by two sample t-test; † denotes p-values obtained by Chi-square test;

‡ denotes p-values obtained by Wilcoxon rank sum test; § denotes p-values obtained by Fisher's exact test

**Table III.** Baseline characteristics of propensity-matched patients in EVT and medical management within **proximal** thrombus location

| <b>Variable</b>                               | <b>EVT<br/>N=32</b> | <b>Medical Management<br/>N=32</b> | <b>P value</b> |
|-----------------------------------------------|---------------------|------------------------------------|----------------|
| <b>Age, mean±SD</b>                           | 71.1±13.0           | 68.5±17.6                          | 0.51*          |
| <b>NIHSS at presentation, median (Q1, Q3)</b> | 4.0 (2.0, 5.0)      | 4.0 (2.5, 5.0)                     | 0.53‡          |
| <b>Wake up stroke, %</b>                      | 18.8                | 9.4                                | 0.47§          |
| <b>Transferred, %</b>                         | 40.6                | 40.6                               | 1.00†          |
| <b>IV-alteplase given, %</b>                  | 25.0                | 34.4                               | 0.41†          |
| <b>Thrombus location, %</b>                   |                     |                                    | 0.80†          |
| M1                                            | 59.4                | 62.5                               |                |
| ICA                                           | 40.6                | 37.5                               |                |
| <b>Onset to EVT arrival window, %</b>         |                     |                                    | 0.61†          |
| 0-6                                           | 37.5                | 43.8                               |                |
| 6-24 or UNK                                   | 62.5                | 56.3                               |                |

\*denotes p-values obtained by two sample t-test; † denotes p-values obtained by Chi-square test;

‡ denotes p-values obtained by Wilcoxon rank sum test; § denotes p-values obtained by Fisher's

exact test

**Table IV.** Baseline characteristics of propensity-matched patients in EVT and medical management within **distal** thrombus location

| <b>Variable</b>                               | <b>EVT<br/>N=29</b> | <b>Medical Management<br/>N=29</b> | <b>P value</b>    |
|-----------------------------------------------|---------------------|------------------------------------|-------------------|
| <b>Age, mean±SD</b>                           | 67.3±15.0           | 62.1±15.8                          | 0.21 <sup>*</sup> |
| <b>NIHSS at presentation, median (Q1, Q3)</b> | 4.0 (2.0, 4.0)      | 3.0 (2.0, 4.0)                     | 0.35 <sup>‡</sup> |
| <b>Wake up stroke, %</b>                      | 17.2                | 24.1                               | 0.75 <sup>§</sup> |
| <b>Transferred, %</b>                         | 24.1                | 24.1                               | 1.00 <sup>†</sup> |
| <b>IV-alteplase given, %</b>                  | 44.8                | 31.0                               | 0.28 <sup>†</sup> |
| <b>Thrombus location, %</b>                   |                     |                                    | 1.00 <sup>§</sup> |
| M2                                            | 93.1                | 93.1                               |                   |
| M3_M4_ACA                                     | 6.9                 | 6.9                                |                   |
| <b>Onset to EVT arrival window, %</b>         |                     |                                    | 0.58 <sup>†</sup> |
| 0-6                                           | 69.0                | 62.1                               |                   |
| 6-24 or UNK                                   | 31.0                | 37.9                               |                   |

<sup>\*</sup> denotes p-values obtained by two sample t-test; <sup>†</sup> denotes p-values obtained by Chi-square test;

<sup>‡</sup> denotes p-values obtained by Wilcoxon rank sum test; <sup>§</sup> denotes p-values obtained by Fisher's

exact test

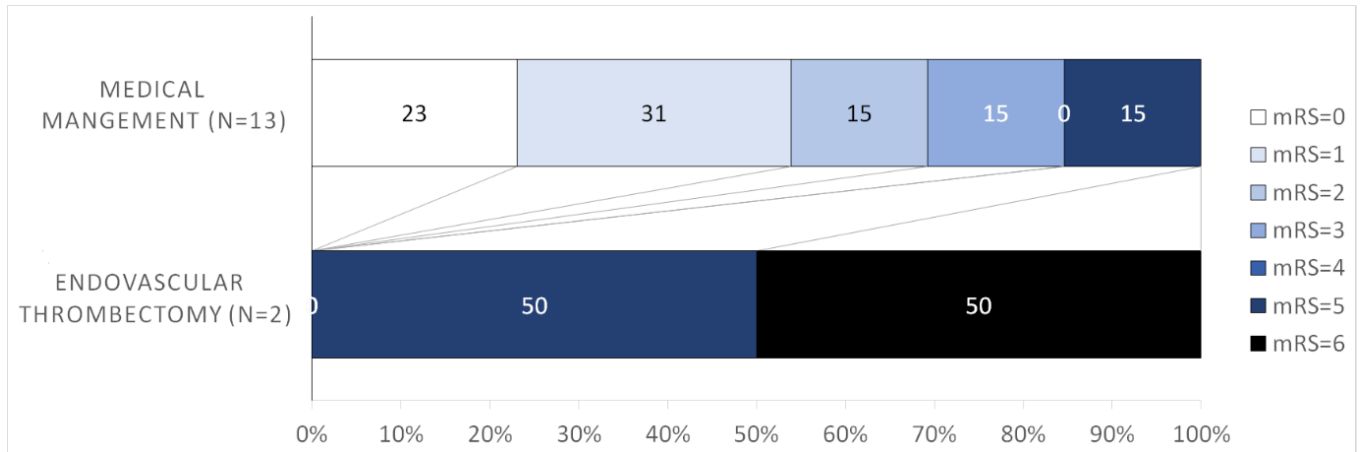

**Figure I.** Modified Rankin Scale scores (mRS) at 90 days compared between endovascular thrombectomy and medical management for M3/M4/ACA thrombus location
